# Supplementary material
Source: MDPI journal article supplement (https://www.mdpi.com/2227-9040/11/2/116)
Supplement: s1 [file s1]

## Supplementary Information

### Ag Nanoparticles Modified Cross-linked SnO<sub>2</sub> Nanosheets for Formaldehyde Vapor Detection

Huaipeng Weng<sup>1</sup>, Xumeng Dong<sup>1</sup>, Yufeng Sun<sup>1,\*</sup>, Haibo Ren<sup>1</sup>, Jiarui Huang<sup>2</sup>, Sang Woo Joo<sup>3,\*</sup>

<sup>1</sup> Key Lab for High Performance Nonferrous Metals of Anhui Province, Anhui Polytechnic University, Wuhu, Anhui, 241000, China

<sup>2</sup> Key Laboratory of Functional Molecular Solids of the Ministry of Education, Anhui Laboratory of Molecule-Based Materials, College of Chemistry and Materials Science, Anhui Normal University, Wuhu, Anhui 241002, China

<sup>3</sup> School of Mechanical Engineering, Yeungnam University, Gyeongsan, Gyeongbuk, 712749, Republic of Korea

Corresponding authors. Email addresses: sunyufeng118@126.com (Y.F. Sun) and swjoo@yu.ac.kr (S.W. Joo).

## 1 Characterization

The products were characterized by XRD (Shimadzu XRD-6000) using high-intensity Cu K $\alpha$  radiation with a wavelength of 1.54178 Å, as well as FESEM (Hitachi S-4800, operated at 5 kV), HRTEM (JEOL-2010 TEM) with an acceleration voltage of 200 kV, and N<sub>2</sub> adsorption–desorption isotherm measurements (Nova 2000E). The pore-size distribution was determined from the desorption branch of the isotherm using the Barrett–Joyner–Halenda (BJH) method. XPS (ESCALAB 250) was also performed. The elemental distribution of products was determined by EDS (Hitachi S-4800, operated at 15 kV).

## 2 Preparation and measurement of gas sensors

Figure S1 presents the experimental setup. The sensors were fabricated as follows: 0.1 g cross-linked Ag@SnO<sub>2</sub> nanosheets, and cross-linked SnO<sub>2</sub> nanosheets were dispersed in 0.3 ml of ethanol to produce a uniform suspension. This suspension was coated uniformly onto the outer surface of an aluminum tube on the bottom, of which a pair of Au electrodes were printed. The working temperature of the gas sensor was achieved by placing a Ni–Cr heater coil into the ceramic tube (Figure S2a). The sensor was then dried for 3 h at 60 °C, calcined for 2 h at 300 °C, and conditioned for 72 h at 300 °C for 72 h in air to improve its stability. A stationary-state gas distribution method was used to determine the gas response using an electrochemical workstation (CHI-660E, Shanghai Chenhua Instruments Co, Ltd., Shanghai, China) using a potentiostatic method with an applied voltage of 0.7 V. Gases were injected into the organic glass test chamber and mixed with air. As for reductive gases, the sensor response was defined as  $R_a/R_g$ , where  $R_a$  is sensor resistance in dry air, and  $R_g$  is sensor resistance in dry air containing test gas. In the measurement system, the responses could also be calculated using  $I_a/I_g$ , where  $I_a$  and  $I_g$  are air and test gas sensor currents, respectively. The response and recovery times were defined as the times required for sensor output to reach 90% saturation after applying or switching off the gas supply.

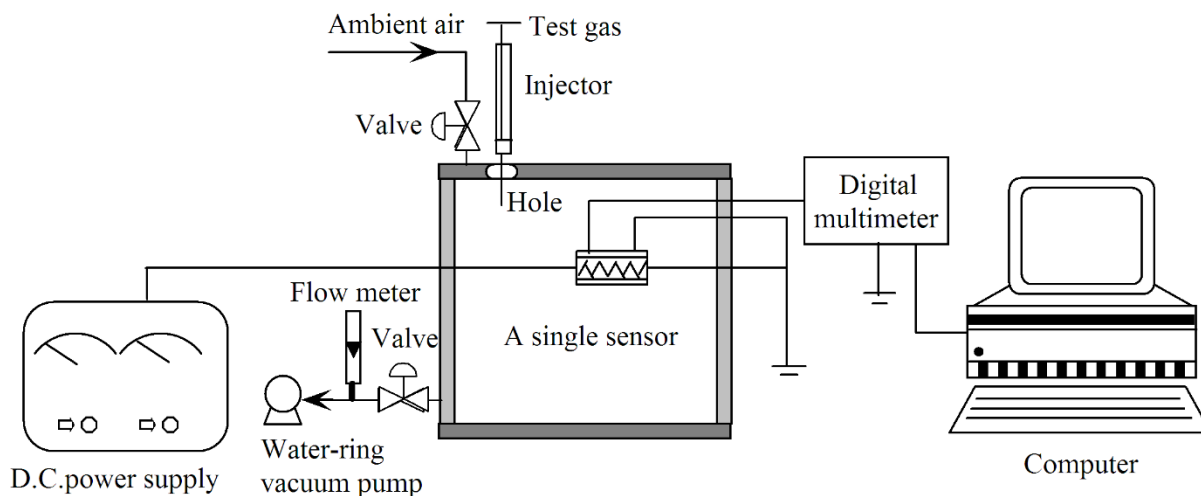

**Figure S1.** Experimental setup.

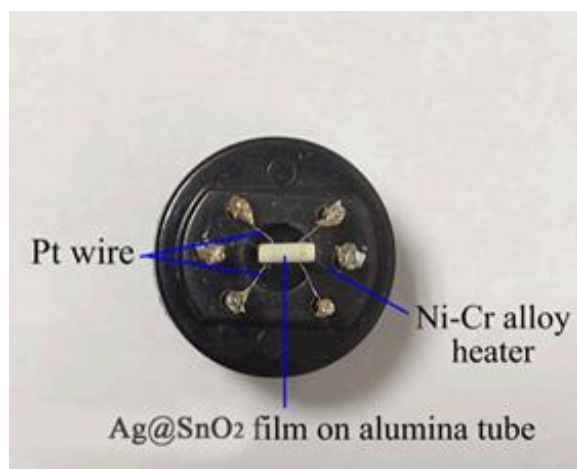

**Figure S2.** Photograph of the sensor.

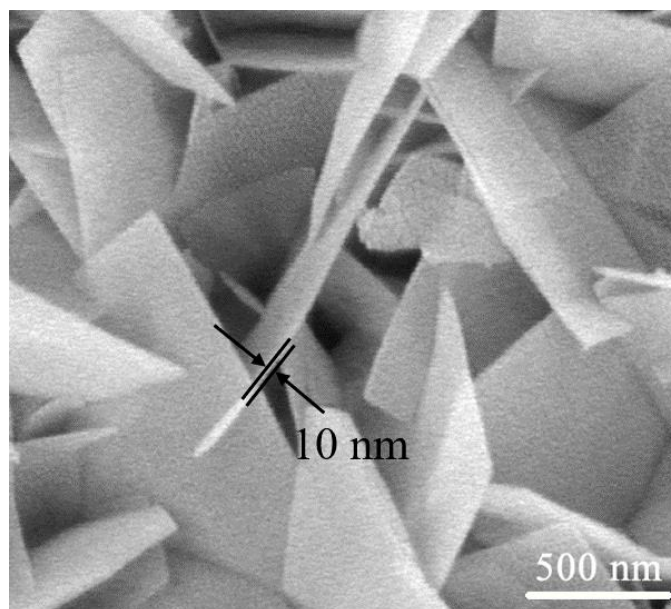

**Figure S3.** High magnification SEM image of cross-linked SnO<sub>2</sub> nanosheets.

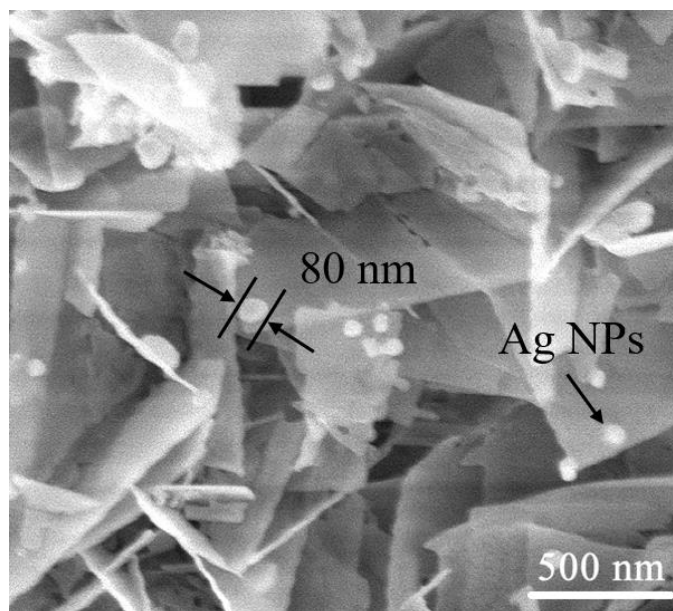

**Figure S4.** High magnification SEM image of cross-linked Ag@SnO<sub>2</sub> nanosheets.

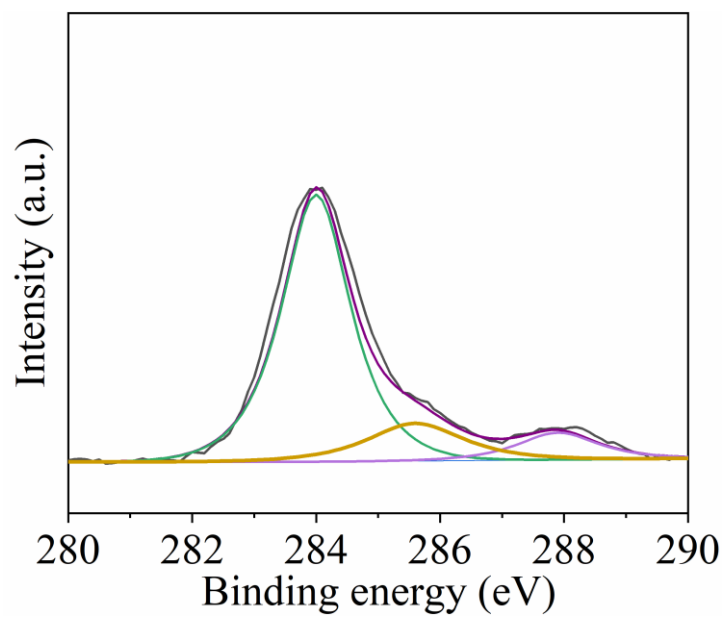

**Figure S5.** C 1s spectrum of cross-linked Ag@SnO<sub>2</sub> nanosheets.

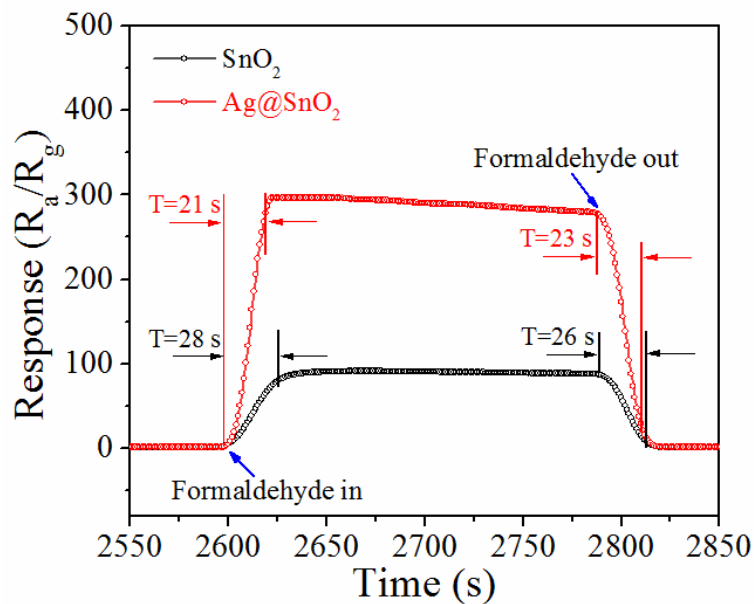

**Figure S6.** Response and recovery characteristics of cross-linked Ag@SnO<sub>2</sub> nanosheets and pure cross-linked SnO<sub>2</sub> nanosheet sensors to 100 ppm formaldehyde vapor.

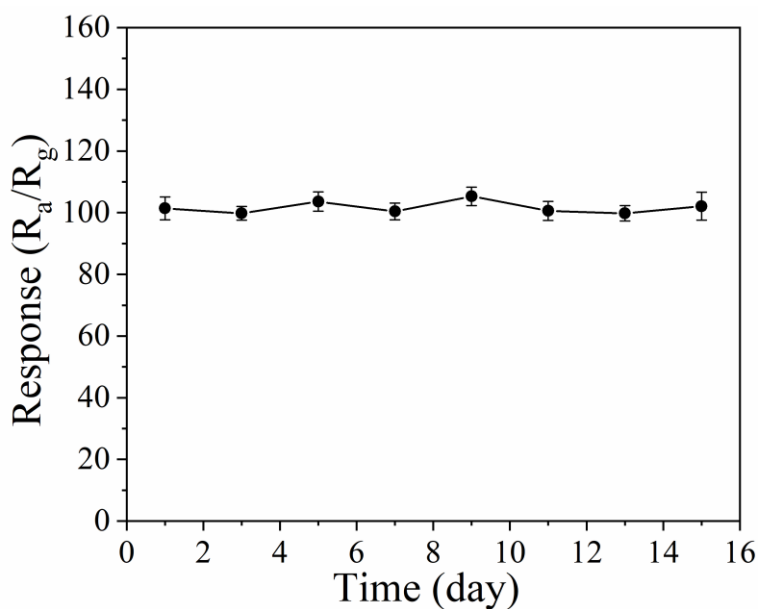

**Figure S7.** Long-term stability of the Ag@SnO<sub>2</sub> sensor towards 100 ppm formaldehyde vapor at the working temperature of 140 °C.

**Table S1** Responses of SnO<sub>2</sub>-based gas sensors towards different concentrations of formaldehyde vapor.

| Sensing materials                              | Concentration (ppm) | Working temperature (°C) | Response | Ref.      |
|------------------------------------------------|---------------------|--------------------------|----------|-----------|
| SnO <sub>2</sub> nanoparticles                 | 20                  | 200                      | 13       | [13]      |
| SnO <sub>2</sub> nanoflowers                   | 100                 | 300                      | 34.6     | [20]      |
| Flower-like SnO <sub>2</sub> microspheres      | 50                  | 275                      | 38.3     | [41]      |
| Pt-SnO <sub>2</sub> nanospheres                | 1                   | 200                      | 16       | [14]      |
| Hollow PdO/ZnO/SnO <sub>2</sub> nanospheres    | 10                  | 140                      | 5.3      | [42]      |
| Ag-SnO <sub>2</sub> nanoparticles              | 10                  | 125                      | 14.4     | [34]      |
| Flower-like Bi-SnO <sub>2</sub> nanostructures | 100                 | 170                      | 36.2     | [43]      |
| Cross-linked Ag@SnO <sub>2</sub> nanosheets    | 100                 | 140                      | 101.4    | This work |
